# Supplementary material for: Differences in adiposity and diet quality among individuals with inflammatory bowel disease in Eastern Canada
Source: PubMed Central journal article supplement (PMC6053167; doi:10.1371/journal.pone.0200580), 2018-07-19
Supplement: pone.0200580.s001.pdf [file pone.0200580.s001.pdf]

**S1 Table: Anthropometric data, fat mass, and strength of participants with and without IBD.**

|                        | <b>mean (SD)</b>   |              |
|------------------------|--------------------|--------------|
|                        | <b>Without IBD</b> | <b>IBD</b>   |
| Age                    | 53.7 (8.8)         | 54.0 (8.7)   |
| Grip Strength, kg      | 23.0 (18.6)        | 22.6 (19.4)  |
| Height, cm             | 166.5 (8.8)        | 165.2 (8.9)  |
| Weight, kg             | 75.0 (14.8)        | 77.6 (15.0)* |
| Waist, cm              | 92.0 (15.2)        | 94.3 (15.5)* |
| Hips, cm               | 104.6 (12.7)       | 106.2 (14.1) |
| BMI, kg/m <sup>2</sup> | 27.0 (4.4)         | 28.1 (5.0)*  |
| Waist-to-hip ratio     | 0.88 (0.09)        | 0.89 (0.07)  |
| Total fat mass, kg     | 24.6 (9.1)         | 26.1 (9.7)*  |
| Trunk fat mass, kg     | 13.1 (5.0)         | 13.9 (4.9)*  |
| Arm fat mass, kg       | 2.6 (1.3)          | 2.8 (1.4)*   |
| Leg fat mass, kg       | 9.0 (3.5)          | 9.5 (3.9)*   |

Abbreviations: BMI, Body mass index; IBD, inflammatory bowel disease

Data presented as means (SD).

\*Indicates significant difference from without IBD (p<0.05).
