# Supplementary material for: Differences in adiposity and diet quality among individuals with inflammatory bowel disease in Eastern Canada
Source: PubMed Central journal article supplement (PMC6053167; doi:10.1371/journal.pone.0200580), 2018-07-19
Supplement: pone.0200580.s002.pdf [file pone.0200580.s002.pdf]

**S2 Table:** Diet quality of participants with and without IBD.

|                                 | <b>Without IBD</b> | <b>IBD</b> |
|---------------------------------|--------------------|------------|
| Meeting Guidelines <sup>a</sup> | <b>n (%)</b>       |            |
| Fruits & Vegetable              | 1632 (13.1)        | 25 (10.9)  |
| Grains                          | 365 (2.9)          | 6 (2.6)    |
| Milk & Dairy                    | 3208 (25.7)        | 51 (22.2)  |
| Meat & Alternatives             | 1685 (13.5)        | 37 (16.1)  |
| Servings per day                |                    |            |
| Total Fruits & Vegetables       | 5.3 (2.7)          | 4.9 (2.5)* |
| Vegetables                      | 2.5 (1.5)          | 2.3 (1.4)* |
| Fruit                           | 2.1 (1.4)          | 1.9 (1.3)* |
| Vegetable/Fruit juice           | 0.7 (1.0)          | 0.7 (1.0)  |
| Green Vegetables                | 0.6 (0.9)          | 0.5 (0.8)  |
| Total Grains                    | 2.7 (1.8)          | 2.9 (2.1)  |
| Whole Grains                    | 1.9 (1.5)          | 1.7 (1.5)  |
| Refined Grains                  | 0.8 (1.0)          | 1.1 (1.4)* |
| Total Dairy Products            | 2.1 (1.2)          | 2.0 (1.2)  |
| Total Meat & Alternatives       | 4.4 (2.4)          | 4.3 (2.5)  |
| Meat & Poultry                  | 1.6 (1.2)          | 1.6 (1.1)  |
| Eggs                            | 1.2 (1.2)          | 1.3 (1.4)  |
| Fish                            | 0.5 (0.7)          | 0.5 (0.7)  |
| Tofu                            | 0.0 (0.2)          | 0.0 (0.2)  |
| Beans & Legumes                 | 0.4 (0.6)          | 0.3 (0.5)  |
| Nuts & Seeds                    | 0.7 (0.7)          | 0.6 (0.7)  |
| Other Diet Components           |                    |            |
| Most often eaten on bread       |                    |            |
| Butter                          | 3883 (31.2)        | 71 (30.9)  |
| Olive oil                       | 301 (2.4)          | -          |
| Margarine                       | 3957 (31.8)        | 85 (37.0)  |
| Low-fat margarine               | 2858 (22.9)        | 45 (19.6)  |
| None                            | 1463 (11.7)        | 25 (10.9)  |
| Fat/oil most often used cooking |                    |            |
| None                            | 71 (0.6)           | -          |
| Margarine                       | 448 (3.6)          | 11 (4.8)   |
| Butter                          | 124 (1.0)          | -          |
| Other                           | 478 (3.8)          | 6 (2.6)    |
| Olive oil                       | 2790 (22.4)        | 44 (19.1)  |
| Canola                          | 850 (6.8)          | 13 (5.7)   |
| Combination of above            | 7673 (61.6)        | 150 (65.2) |
| Type of milk usually consumed   |                    |            |
| Homogenized                     | 346 (2.8)          | 10 (4.3)   |
| 2% cow's milk                   | 2166 (17.4)        | 44 (19.1)  |
| 1% cow's milk                   | 3856 (30.9)        | 62 (27.)   |
| Skim cow's milk                 | 4261 (34.2)        | 69 (30.0)  |
| Soy                             | 417 (3.3)          | 8 (3.5)    |
| Other                           | 533 (4.3)          | 14 (6.1)   |
| Regular soft drink frequency    |                    |            |
| Never                           | 5275 (42.3)        | 104 (45.2) |

|                                       |             |            |
|---------------------------------------|-------------|------------|
| 1-3 times per month                   | 4910 (39.4) | 87 (37.8)  |
| 1-4 times per week                    | 1669 (13.4) | 26 (11.3)  |
| 5-7 times per week                    | 295 (2.4)   | 6 (2.6)    |
| >1 per day                            | 313 (2.5)   | 7 (2.2)    |
| Diet soft drink frequency             |             |            |
| Never                                 | 7107 (57.0) | 134 (58.3) |
| 1-3 times per month                   | 3226 (25.9) | 55 (23.9)  |
| 1-4 times per week                    | 1285 (10.3) | 27 (11.7)  |
| 5-7 times per week                    | 385 (3.1)   | -          |
| >1 per day                            | 459 (3.7)   | 10 (4.3)   |
| Amount of regular or diet soft drinks |             |            |
| <10 ounces (<1 can/bottle)            | 9266 (74.4) | 182 (79.1) |
| 12-16 ounces (1 can/bottle)           | 3047 (24.5) | 44 (19.1)  |
| >16 ounces (>1 can/bottle)            | 149 (1.2)   | -          |
| Fast food frequency                   |             |            |
| Never                                 | 1985 (15.9) | 29 (12.9)  |
| ≤ 1 per month                         | 5593 (44.9) | 111 (48.3) |
| 2-5 times per month                   | 4447 (35.7) | 85 (37.0)  |
| 2-4 times per week                    | 343(2.8)    | -          |
| ≥5 times per week                     | 94 (0.8)    | -          |

<sup>a</sup>Meeting Guidelines: based on Canada's Guidelines for Healthy Eating by sex and age.

Abbreviations: IBD, inflammatory bowel disease

- Data suppressed due to small cell counts.

\*Indicates significant difference from without IBD (p<0.05).
