# Supplementary material for: Differences in adiposity and diet quality among individuals with inflammatory bowel disease in Eastern Canada
Source: PubMed Central journal article supplement (PMC6053167; doi:10.1371/journal.pone.0200580), 2018-07-19
Supplement: pone.0200580.s003.pdf [file pone.0200580.s003.pdf]

**S3 Table:** Associations between health behaviours, dietary factors and IBD.

| <b>Variable</b>                 | <b>Odds ratio</b> | <b>95% CI</b>      |
|---------------------------------|-------------------|--------------------|
| Current Smoker                  | 1.517             | 0.896-2.568        |
| High Level of Physical Activity | 1.140             | 0.839-1.550        |
| Total Fruits & Vegetables       | <b>0.940</b>      | <b>0.894-0.989</b> |
| Vegetables                      | <b>0.887</b>      | <b>0.808-0.973</b> |
| Fruit                           | <b>0.889</b>      | <b>0.802-0.985</b> |
| Vegetable/Fruit juice           | 1.030             | 0.904-1.173        |
| Green Vegetables                | 0.930             | 0.795-1.088        |
| Total Grains                    | 1.054             | 0.982-1.130        |
| Whole Grains                    | 0.925             | 0.843-1.015        |
| Refined Grains                  | <b>1.266</b>      | <b>1.150-1.393</b> |
| Total Milk & Dairy              | 0.962             | 0.863-1.073        |
| Total Meat & Alternatives       | 0.979             | 0.926-1.035        |
| Meat & Poultry                  | 0.991             | 0.888-1.105        |
| Eggs                            | 1.053             | 0.946-1.173        |
| Fish                            | 0.876             | 0.715-1.073        |
| Tofu                            | 1.054             | 0.604-1.840        |
| Beans & Legumes                 | 0.784             | 0.613-1.002        |
| Nuts & Seeds                    | 0.910             | 0.756-1.094        |

Boldface text indicates significant association ( $P < 0.05$ )
